# Supplementary material for: Ionic liquid-assisted synthesis of 3D nanoporous gold and its superior catalytic properties
Source: Royal Society of Chemistry journal article supplement (doi:10.1039/c8ce01130c), 2018-01-01
Supplement: c8ce01130c1.pdf [file c8ce01130c1.pdf]

## Supporting information

### **Ionic liquid-assisted synthesis of 3D nanoporous gold and its superior catalytic properties**

Kaisheng Yao,<sup>\*a</sup> Chenchen Zhao,<sup>a</sup> Nan Wang,<sup>a</sup> Weiwei Lu,<sup>a</sup> Huiyong Wang,<sup>b</sup> Shuang Zhao,<sup>a</sup> and Jianji Wang<sup>\*b</sup>

<sup>a</sup> *School of Chemical Engineering and Pharmaceutics, Henan University of Science and Technology, Luoyang, Henan 471023, P. R. China*

<sup>b</sup> *Collaborative Innovation Center of Henan Province for Green Manufacturing of Fine Chemicals, Key Laboratory of Green Chemical Media and Reactions, Ministry of Education, School of Chemistry and Chemical Engineering, Henan Normal University, Xinxiang, Henan 453007, P. R. China*

\*Author to whom all correspondence should be addressed.

E-mail: [jwang@htu.cn](mailto:jwang@htu.cn); [ksyao@126.com](mailto:ksyao@126.com)

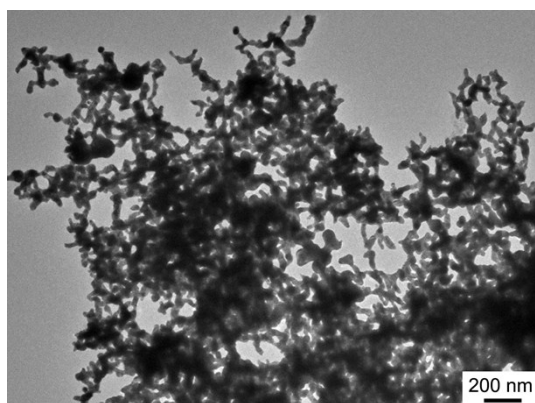

**Fig. S1** TEM image at low magnification of NPG

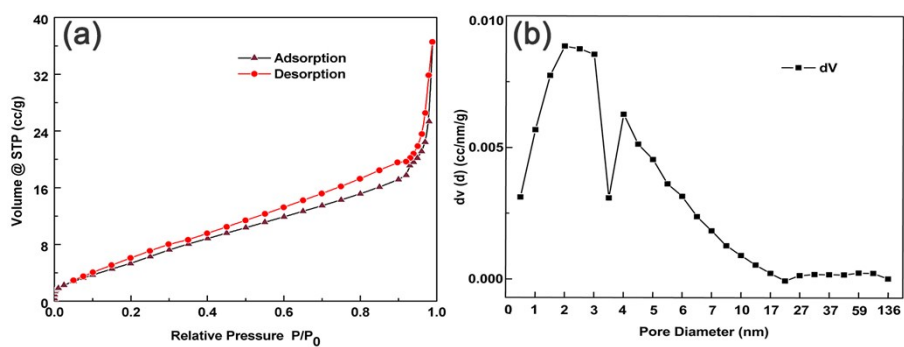

**Fig. S2** N<sub>2</sub> adsorption-desorption isotherms (a) and pore size distribution (b) of 3D NPG.

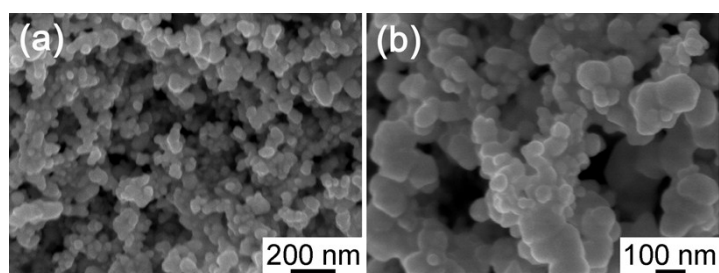

**Fig. S3** The differently magnified FESEM images of Au products prepared in the presence of [HEmim]Br.

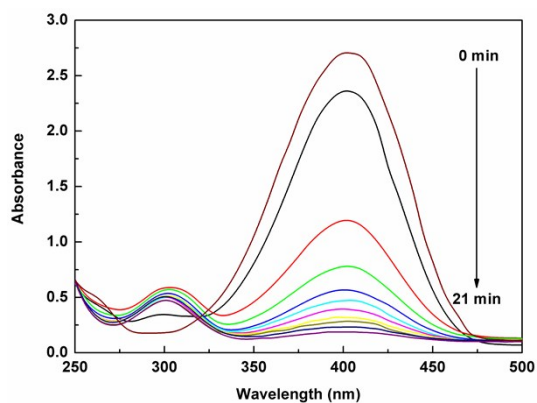

**Fig. S4** Time-dependent absorption spectra of the reduction of *p*-NP using Au elongated particles as catalyst at 25 °C.

**Table S1** Comparison of catalytic activity among several gold nanocrystals for *p*-NP reduction.

| Morphology     | Catalytic time (min) | Rate constant ( $\text{min}^{-1}$ ) | Ref.      |
|----------------|----------------------|-------------------------------------|-----------|
| NPG            | 14                   | 0.1903                              | This work |
| Au nanospheres | 64                   | -                                   | [S1]      |
| Au nanorods    | 30                   | 0.0740                              | [S2]      |

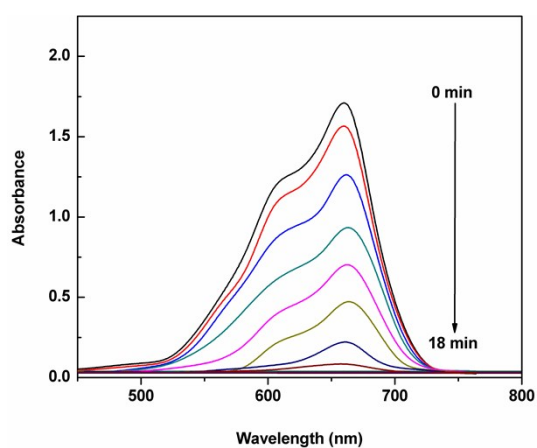

**Fig. S5** Time-dependent absorption spectra of the degradation of MB using Au elongated particles as catalyst at 25 °C.

## References

- S1 S. Kundu, S. Lau and H. Liang, *J. Phys. Chem. C*, 2009, **113**, 5150-5156.
- S2 X. Bai, Y. Gao, H. G. Liu and L. Zheng, *J. Phys. Chem. C*, 2009, **113**, 17730-17736.
